# Supplementary material for: Predicting Tropical Dry Forest Successional Attributes from Space: Is the Key Hidden in Image Texture?
Source: PLoS One. 2012 Feb 20;7(2):e30506. doi: 10.1371/journal.pone.0030506 (PMC3282724; doi:10.1371/journal.pone.0030506)
Supplement: Table S1 — Within-site variability for vegetational variables. See Table 1 for vegetational attributes abbreviations and units of measurement. SE: Standard error. M: mature forest. (XLS) [file pone.0030506.s001.xls]

## Sheet: Sheet1
Age	SE Hgt	SE Dn	SE BA	SE CC
2	0.252488	154.616	0.121275	366.62
3	0.204507	204.507	0.11366	593.806
5	0.119896	252.797	0.312472	612.165
7	0.263292	90.9298	0.237095	685.513
9	0.327236	327.931	0.397837	621.47
12	0.112796	148.955	0.217867	947.674
13	0.645463	101.294	0.580786	1031.26
18	0.280074	275.568	0.274699	929.815
20	0.328798	189.984	0.435905	883.049
25	0.395524	145.416	0.159596	472.045
32	0.306526	174.217	0.159596	504.474
38	0.243563	230.799	0.766033	1046.18
42	0.163452	196.982	0.57372	1330.44
60	0.147902	107.529	0.829924	857.327
M	0.37632	164.57	0.684146	1035.05
